# Supplementary material
Source: publisher site journal article supplement (https://study.sagepub.com/system/files/donnelly_1e_supplementary_materials_final.pdf)
Supplement: Supplementary file 1 [file donnelly_1e_supplementary_materials_final.pdf]

# Exploring the U.S. Census

Your Guide to  
America's Data

## Online Supplementary Materials

**Frank Donnelly**

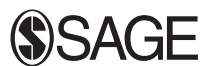

Los Angeles | London | New Delhi  
Singapore | Washington DC | Melbourne

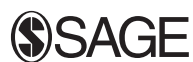

FOR INFORMATION:

SAGE Publications, Inc.  
2455 Teller Road  
Thousand Oaks, California 91320  
E-mail: [order@sagepub.com](mailto:order@sagepub.com)

SAGE Publications Ltd.  
1 Oliver's Yard  
55 City Road  
London, EC1Y 1SP  
United Kingdom

SAGE Publications India Pvt. Ltd.  
B 1/I 1 Mohan Cooperative Industrial Area  
Mathura Road, New Delhi 110 044  
India

SAGE Publications Asia-Pacific Pte. Ltd.  
18 Cross Street #10-10/11/12  
China Square Central  
Singapore 048423

---

Acquisitions Editor: Leah Fargotstein  
Editorial Assistant: Claire Laminen  
Content Development Editor: Chelsea Neve  
Production Editor: Rebecca Lee  
Copy Editor: QuADS Prepress Pvt. Ltd.  
Typesetter: Integra  
Proofreader: Ellen Brink

Copyright © 2020 by SAGE Publications, Inc.

---

All rights reserved. Except as permitted by U.S. copyright law, no part of this work may be reproduced or distributed in any form or by any means, or stored in a database or retrieval system, without permission in writing from the publisher.

All third party trademarks referenced or depicted herein are included solely for the purpose of illustration and are the property of their respective owners. Reference to these trademarks in no way indicates any relationship with, or endorsement by, the trademark owner.

# CONTENTS

---

|                                                         |           |
|---------------------------------------------------------|-----------|
| <b>Chapter 4 • Subject Characteristics</b>              | <b>1</b>  |
| 4.7 Exercises                                           | 1         |
| Conditionals in Spreadsheets                            | 1         |
| <b>Chapter 5 • The Decennial Census</b>                 | <b>3</b>  |
| 5.5 Exercises                                           | 3         |
| Accessing Data in Bulk: The FTP Site                    | 3         |
| <b>Chapter 6 • The American Community Survey</b>        | <b>16</b> |
| 6.4 Exercises                                           | 16        |
| Ranking ACS Data and Testing for Statistical Difference | 16        |
| <b>Chapter 11 • Census Data Derivatives</b>             | <b>24</b> |
| 11.4 Means and Medians for Aggregates                   | 24        |
| References                                              | 30        |

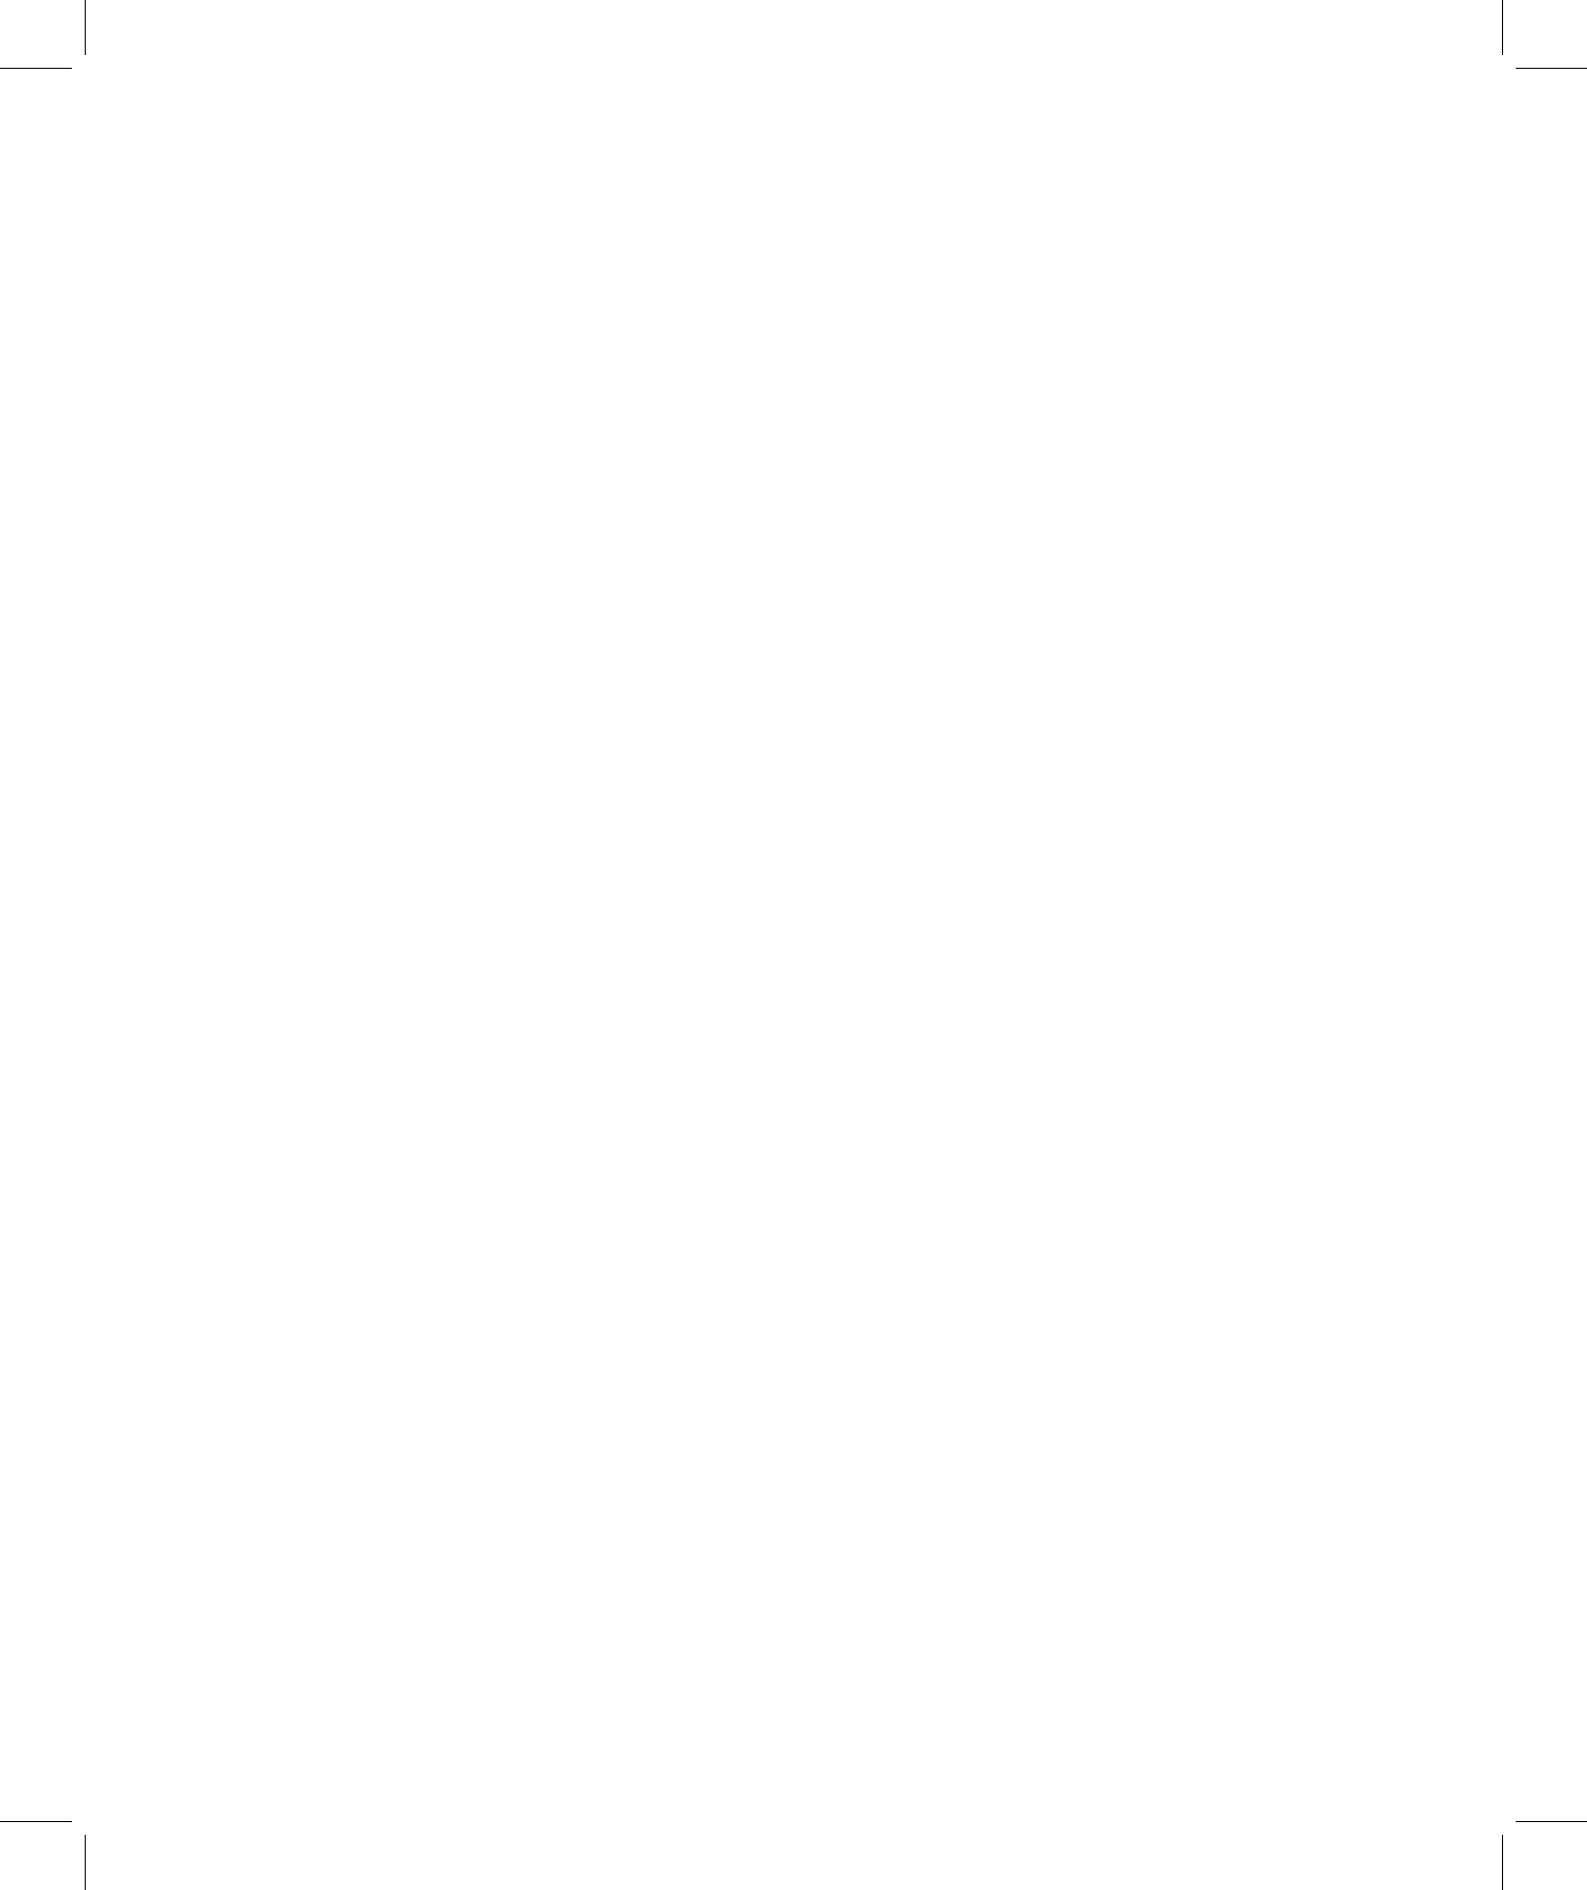

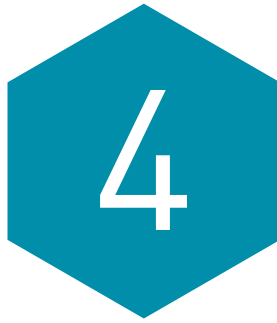

# SUBJECT CHARACTERISTICS

## 4.7 EXERCISES

---

### Conditionals in Spreadsheets

In the first exercise in Chapter 4, we aggregated age data into generational categories by manually assigning the age ranges to each category. Wouldn't it be nice if we could do this automatically?

Spreadsheets have special functions called conditional statements, which specify that something should be done if certain criteria are met. There is a general statement called IF: `=IF(B2>10, B2+C2, B2)`. IF B2 is greater than 10 (the condition), then sum B2 and C2 in this cell, otherwise just show B2 in this cell. There are also conditionals that count values (COUNTIF), sum values (SUMIF), and average values (AVERAGEIF).

In our example, we could use SUMIF and SUMIFS to categorize the age data. First, in the sheet that has the single-year age data, we would add a column in E to hold just the age number. You would type 0 in the cell beside the total for Under 1 Year and then paste the value all the way down: Calc automatically increments the values by 1. We would just have to go to the bottom of the sheet and modify top age categories to 105 and 110 years, respectively.

Second, back in the generational sheet for the Greatest generation, we would use this statement: `=SUMIF(Sheet2.E2:E104, ">"&D2, Sheet2.D2:D104)`. The first argument is the range that we are evaluating the argument against, the second is the criterion that must be met, and the third is the range that contains values that should be summed if the criterion is met. So look at the range of ages that are in column E in the age data, and if any values are greater or equal to the oldest person of that generation, sum the values (the number of people in each bracket) for those ages. In Calc, for criteria that are applied against a cell, you place the operator in quotes and attach it to the cell using the ampersand "&." In Excel, you would simply quote the operator and cell without the ampersand.

The other generations are a bit different as they require multiple criteria: People must be greater than one age but less than another. In these cases, we use the SUMIFS function:

`=SUMIFS(Sheet2.D$2:D$104, Sheet2.E$2:E$104, ">="&D3, Sheet2.E$2:E$104, "<="&E3)`.

The first argument is the range of values that should be summed (population), followed by the first range of values that we apply the criterion against (range of ages) and the first criterion (for Silent generation, greater than or equal to the youngest age), then another range for criterion (same as before) and the second criterion (less than or equal to oldest age). We lock the value and criteria ranges with a "\$" sign to keep them fixed, but we do *not* lock the criterion. This allows us to copy and paste the formula all the way down, so we can easily apply it to the other generations.

This is a quicker approach, once you learn how to use the functions. Remember, you can always go to Insert—Function and use the wizard for step-by-step assistance.

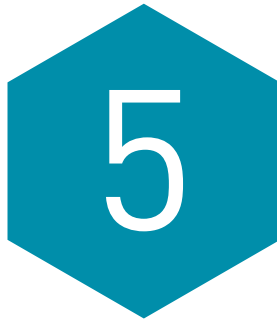

# THE DECENNIAL CENSUS

## 5.5 EXERCISES

---

### Accessing Data in Bulk: The FTP Site

While `data.census.gov` is the destination for most users who want to look up census statistics or download a few tables, it will not be your destination if you need to download data in bulk. There are a few alternatives that you can use, and the census FTP (File Transfer Protocol) site is the place to go if you really want all data for all geographies for a particular state for a specific dataset. The site is organized similarly to a file system on a computer or local network: There are folders for census programs with subfolders for specific datasets. You navigate through the folders until you find what you're looking for, and you download what you need in a large zip file. Given the size of these files and the way they are constructed, using a spreadsheet is out of the question. In this exercise, we'll examine how Summary File 1 (SF1) is constructed and how you can load this data into SQLite.

You can access the FTP site directly at `https://www2.census.gov/`, but it's probably easier to navigate via individual program and dataset pages, as these will lead you directly to the area you want. The program pages also contain the technical documentation that's essential for understanding how the files are constructed. For example, visit the page for SF1 for the 2010 census, and you'll get information that's specific to that dataset with a direct link to the FTP location: `https://www.census.gov/data/datasets/2010/dec/summary-file-1.html`.

SF1 (as well as the other decennial and American Community Survey [ACS] summary files) is organized, so there's one extract for each state that contains all geography that nests within the state, as well as a few geographies that are split in part between states. There is a national-level summary file, but this does *not* contain all the census data for the entire nation; it only includes geographies that do not nest within states. So it has ZIP Code Tabulation Areas, regions and divisions, metropolitan areas, and urban/rural divisions, but it doesn't have counties, tracts, or block groups. These geographies are only available state by state in the state files. If you need data for all tracts or block groups for the nation, there are better ways of getting it (we'll demonstrate the Dexter tool in the next chapter). The FTP site is really intended for getting everything there is for one state at a time, or for the truly die-hard who need absolutely everything and plan to download and stitch everything together.

The summary files for each state are a collection of text files that contain every variable for all geographies. The 2010 SF1 files include 47 comma-delimited text files that contain all the variables, plus one fixed-width geographic header file that contains the details about each piece of geography. Each data file contains a range of variables that is published in a specific table, such as P1, P2, H1, and so on. Using the Census Bureau's SF1 technical documentation, you can look up a table number and identify which file it falls in. Each record in each file is uniquely identified with an ID number called LOGRECNO, which allows you to relate the table to other tables and to relate it to the geographic header file, so you can select topic records for specific geography. The data files do not contain the standard GEOIDs or FIPS codes; to get the geography, you link the data files back to the geographic header file via LOGRECNO, and the header file contains the constituent parts of GEOIDs.

The structure of each series of state files and the national file are identical; the number of files and columns and the positions of the columns in the files are the same. The summary files for the 2000 census used a similar structure as 2010, and it is likely that 2020 will follow suit. (Data for the ACS is packaged on the FTP site in a similar way).

One of the problems with the decennial summary files is that they do not include header rows; there isn't a row that contains the ID names of the columns, so you have no idea what the column refers to unless you look it up in the technical documentation. The Census Bureau provides table shells for Microsoft Access databases, so you can create the blank table structures with the header rows and import the files into them. The import process is cumbersome given the limitations of Microsoft Access. If you wanted to use another database or a statistical program, you would need to use the documentation to manually create the blank tables.



Fortunately, we can rely on the kindness and diligence of others who have already done this work! A number of researchers have created scripts for importing census summary files into different statistical packages like R and SAS and have written SQL CREATE TABLE scripts for generating table shells for many databases. You can find these by searching the internet and, in particular, by looking on GitHub, which is a large open source repository and version control system for writing scripts and software. A scripter/programmer posted SQL scripts for creating tables for SF1 in PostgreSQL, which is a popular open source enterprise-level database. I have forked this repository and created a new one with scripts for SQLite: [https://github.com/frankpd/create\\_census\\_tables\\_sql](https://github.com/frankpd/create_census_tables_sql).

What do the data files look like, and why do we need a script to load them? Here is the structure of the first SF1 data file for Hawaii, hi000012010.sf, showing the first 10 records:

```
SF1ST,HI,000,01,0000001,1360301
SF1ST,HI,000,01,0000002,0
SF1ST,HI,000,01,0000003,0
SF1ST,HI,000,01,0000004,0
SF1ST,HI,000,01,0000005,0
SF1ST,HI,000,01,0000006,0
SF1ST,HI,000,01,0000007,0
SF1ST,HI,000,01,0000008,30858
SF1ST,HI,000,01,0000009,1360211
SF1ST,HI,000,01,0000010,432868
```

Notice there is no header row; we have to consult the documentation to see what the columns represent in each file. The first two fields indicate the summary file (SF1) and state (Hawaii). The third and fourth fields are ID numbers for specific characteristics, which are largely not used in state-level SF1. The fifth field is the LOGRECNO unique ID, which is associated with a specific geography *within* this summary file. So LOGRECNO 0000001 in the Hawaii file refers to the State of Hawaii, while in a summary file for another state 0000001 would refer to that state. These first five fields are the same in every one of the 47 tables. The last field in this data file is p0010001, which refers to the first population variable in the dataset: total population as published in Table P1. Some of the files (like this one) are relatively small and contain variables from one census table, but in most cases, variables from several tables will appear in one file. For example, P1 appears in File 1 and P2 is in File 2, but File 3 contains variables from Tables P3 through P9.

The format for the geographic header file is more complex, as it is not a delimited text file with values separated by a comma or tab but is a fixed-width file. In a fixed-width

file, values occupy specific positions across the row, and you must delineate them using a code book. For example, Positions 1 through 6 hold the fileid, Positions 7 and 8 hold the state abbreviation, and so on. You can parse fixed-width files manually in Calc or other spreadsheets, but it is a tedious process for large files. It's better to use either SQL or a scripting language to parse the files. Fortunately, others have written scripts for doing this, and the scripts I have modified and created for SQLite include a parsing script.

A final note before we begin: One of the tables that SF1 does *not* include is the demographic profile table DP01, which as we have seen contains a cross section of the most essential census variables in one table. The demographic profile is packaged separately in its own series of state-based and national summary files. It is a much simpler dataset, as it contains just one data file and the geographic header file. If SF1 is overkill for your needs, the DP summary file is a quick alternative. It is released before SF1 with a smaller subset of geographies, and then is updated following the release of SF1 to include all the geographies that were published in SF1. <https://www.census.gov/data/datasets/2010/dec/demographic-profile-with-geos.html>.

Chapter 5 Supplemental Exercise folder contains the SF1 data for Hawaii, the SQL scripts we need for loading and parsing data in SQLite, and the technical documentation from the Census Bureau in PDF format. Alternatively, you could access the data from the following source:

**hi2010sf1** : 2010 Decennial Census, all SF1 data, Hawaii (state)—[https://www2.census.gov/census\\_2010/04-Summary\\_File\\_1/](https://www2.census.gov/census_2010/04-Summary_File_1/)

1. **Create a new database.** Launch the DB Browser for SQLite. Create a new database called `exercise3.sqlite`. Save it in Chapter 5 Supplemental Exercise folder. When prompted to create a new, blank table, hit the Cancel button.
2. **Run the SQL file to create the empty table shells.** Select the Execute SQL tab. Hit the second button above the SQL window that looks like a folder—this is the Open SQL file button. Browse to Chapter 5 Supplemental Exercise folder, and select the file `create_SF1_2010.sql`. Once you do, the file will be loaded in the SQL window, and you can see the long list of CREATE TABLE statements. In the last exercise, we executed statements one by one, but it is also possible to execute statements in a series. Each statement ends with a semicolon that indicates where one statement ends and the next one begins. Hit the blue arrow button to execute the script. This will create all the blank tables, which you can see and explore if you select the DB schema tab in the lower right-hand corner (Figure 5.1). Save your work by hitting the Write Changes button.

**FIGURE 5.1** LOAD AND RUN SCRIPT TO CREATE SF1 TABLES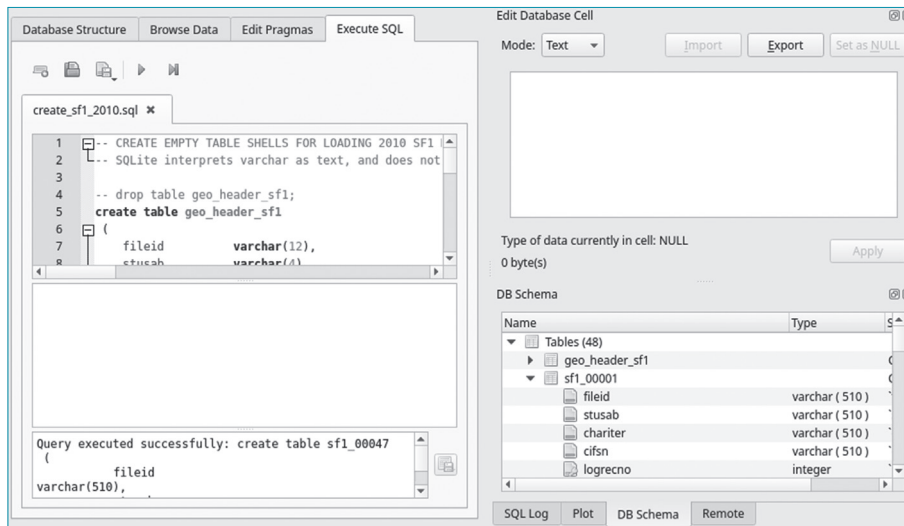

3. **Load the first population file.** Go to File—Import—Table From CSV File. Browse to Chapter 5 Supplemental Exercise hi2010sf1 folder. At the bottom of the screen, change the option from Text files to All files (even though the data files are in a CSV format, their file extension is .sf1, so they don't appear when looking for files with the .csv extension). Select the first sf1 file hi000012010.sf1, and hit Open. Under table name, change the name to sf1\_00001. The field separator should be a comma. Uncheck the box that says Column names in first line, but check the box to Trim fields (Figure 5.2). Hit OK. You'll get prompted with a message that says "There is already a table with that name. Do you want to import data into it?" Click Yes. The data will import. When it's finished, hit the Browse tab, and in the table drop down, select table sf1\_00001. You should see all the data has been imported into the empty table. Save your work.
4. **Load the next two population files.** Repeat the previous step and load in the next two population files, file hi000022010.sf1 into table sf1\_00002 and file hi000032010.sf1 into table sf1\_00003.
5. **Create staging table for geographic headers.** Getting the geographic header file into the database is a two-step process. First, we'll load the fixed-width file into a temporary table where we store everything in a single field. Hit the SQL tab, and hit the first button above the window to add a new SQL window.

**FIGURE 5.2**  **IMPORT FIRST SF1 TABLE**

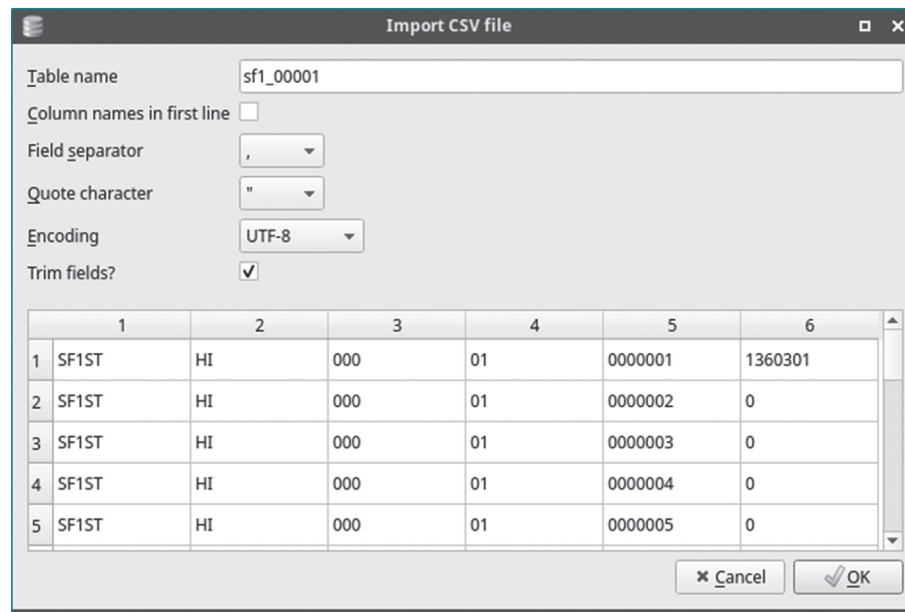

Then close the window that had our creation script by hitting the X. Write this statement in the empty window:

```
CREATE TABLE geo_header_staging (
  data TEXT);
```

Then import the geographic header file higeo2010.sf1 (last file in the file list) into the `geo_header_staging` table. In the import window, change the table name to `geo_header_staging`, change the field separator option to Other, and leave it blank. Also uncheck the trim fields box (Figure 5.3). When finished, browse the table to make sure the data was imported.

- 6. Parse and load the geo header data into the permanent table.** Go to the Execute SQL tab, and erase the previous statement. Hit the open SQL file button (second button), and select the `geoheader_sqlite_sf1_2010.sql` file to load the script into the SQL window. Hit the execute button (Figure 5.4). This script takes each row in the staging table and splits it into individual values to fit into the `geo_header_sf1` table. The values are split using the substring function that we saw earlier at designated positions based on the Census Bureau's documentation. We also use a function called `trim` to remove blank spaces before or after

FIGURE 5.3 ■ IMPORT GEOGRAPHIC HEADER FILE

**Import CSV file**

Table name:

Column names in first line: ☐

Field separator:

Quote character:

Encoding:

Trim fields?: ☐

|   | 1                |
|---|------------------|
| 1 | SF1ST HI04000... |
| 2 | SF1ST HI04089... |
| 3 | SF1ST HI04090... |
| 4 | SF1ST HI04091... |

each value and, in some cases, a function called `cast` to convert values from one data type to another (in this case text to integers).

7. **Browse the `geo_header_sf1` table.** Browse the data for `geo_header_sf1`. Click on the `sumlev` column to sort the data by summary level. This table contains records for every piece of geography in Hawaii that nests fully (and in some cases partially) within the state. Remember the summary level codes from Chapter 3? Code 040 is for the state level. The first record with `sumlev` 040 and `geocomp` 00 is for the state as a whole. The `geocomp` field indicates whether the record pertains to a specific geographic component of the area, for example, `sumlev` 040 `geocomp` 95 indicates this record is for the portion of

**FIGURE 5.4** ■ LOAD AND RUN SCRIPT TO PARSE AND INSERT GEOGRAPHIC HEADER DATA

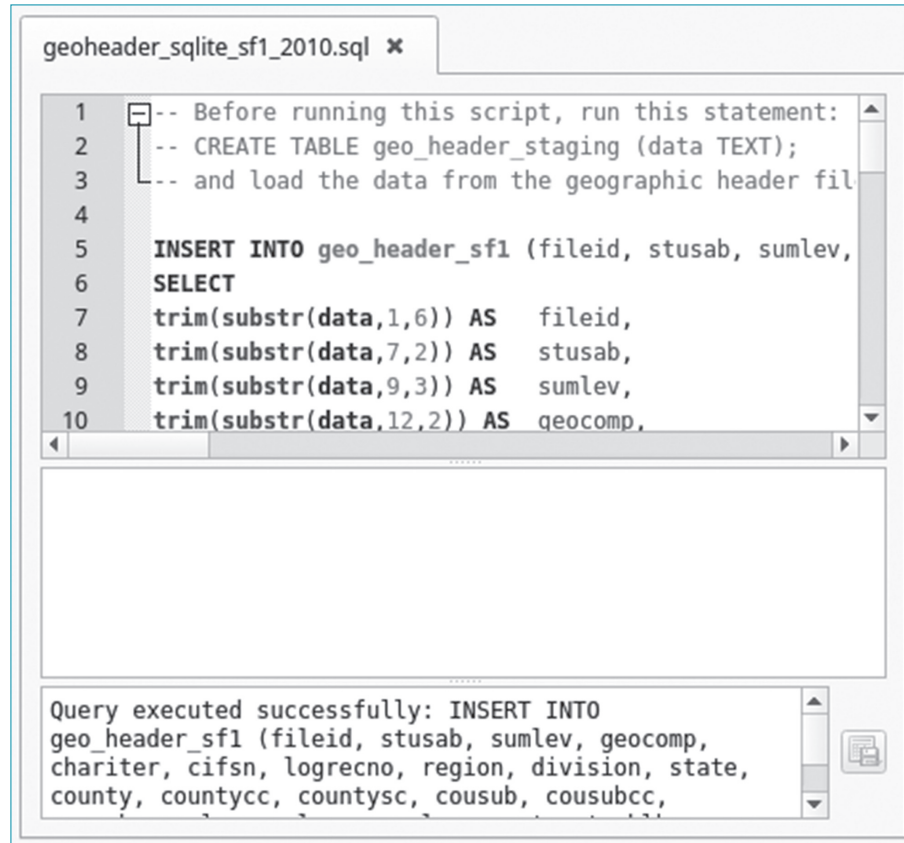

the state that is Hawaiian Home Land, while sumlev 040 geocomp A1 is for the portion of the state that is in a metropolitan or micropolitan area (Figure 5.5). These are provided as convenient summaries (see the technical documentation for a full list of codes). In the state-level summary files, only states have component codes.

8. **Identify all summary levels.** Go to the Execute SQL tab, and hit the first button to open a new SQL tab. The `DISTINCT` qualifier returns all unique instances of a value or combination of values. Type this query to identify the available summary levels in this dataset:

```

SELECT DISTINCT sumlev
FROM geo_header_sf1
ORDER BY sumlev;

```

**FIGURE 5.5** SUMMARY LEVEL AND GEOGRAPHIC COMPOSITION CODES

| Database Structure Browse Data Edit Pragmas Execute SQL |        |        |        |         |          |        |          |        |
|---------------------------------------------------------|--------|--------|--------|---------|----------|--------|----------|--------|
| Table: geo_header_sf1                                   |        |        |        |         |          |        |          |        |
|                                                         | fileid | stusab | sumlev | geocomp | chariter | cifsn  | logrecno |        |
|                                                         | Filter | Filter | Filter | Filter  | Filter   | Filter | Filter   | Filter |
| 1                                                       | SF1ST  | HI     | 040    | 00      | 000      |        | 1        | 4      |
| 2                                                       | SF1ST  | HI     | 040    | 89      | 000      |        | 2        | 4      |
| 3                                                       | SF1ST  | HI     | 040    | 90      | 000      |        | 3        | 4      |
| 4                                                       | SF1ST  | HI     | 040    | 91      | 000      |        | 4        | 4      |
| 5                                                       | SF1ST  | HI     | 040    | 92      | 000      |        | 5        | 4      |
| 6                                                       | SF1ST  | HI     | 040    | 93      | 000      |        | 6        | 4      |
| 7                                                       | SF1ST  | HI     | 040    | 94      | 000      |        | 7        | 4      |
| 8                                                       | SF1ST  | HI     | 040    | 95      | 000      |        | 8        | 4      |
| 9                                                       | SF1ST  | HI     | 040    | A0      | 000      |        | 9        | 4      |
| 10                                                      | SF1ST  | HI     | 040    | A1      | 000      |        | 10       | 4      |

9. **Select all the place records in Hawaii.** Let's select the records for all places in Hawaii. Erase the previous query and enter this one:

```
SELECT *
FROM geo_header_sf1
WHERE sumlev='160';
```

Once you get the results for the 151 places, scroll across the table and explore a little. You will see that in addition to the place codes, you also have fields for codes that are above that summary level. Since places nest within states at summary level 160, we don't have codes for counties or county subdivisions as places can cross these boundaries. Keep scrolling right, and we will see the name of the areas under "name" and the area in land and water, which is in square meters. The total population and housing units are included for convenience in fields pop100 and hu100 (Figure 5.6).

10. **Tie data together.** Now, what if we wanted to select some variables for specific places? Let's say we want to see the total population and the total population who are Hawaiian or Pacific Islanders alone for all places. To do this, we need to consult the summary file technical documentation. First, we'd locate the summary-level code for places under the summary-level sequence chart in Chapter 4. Then we need to locate the tables that contain data on race by looking at the Subject Locator in Chapter 3 or by browsing through the list of tables in Chapter 5. Based on what we've already covered in this book, we

**FIGURE 5.6** PLACES IN HAWAII IN THE GEOGRAPHIC HEADER FILE

|   | arealand | areawatr | name         | funcstat | gcuni | pop100 | hu100 | intptlat    | intptlon     | lsadc | par |
|---|----------|----------|--------------|----------|-------|--------|-------|-------------|--------------|-------|-----|
| 1 | 6978693  | 0        | Ahuimanu CDP | S        | I     | 8810   | 2826  | +21.4378905 | -157.8403300 | 57    |     |
| 2 | 4301523  | 276192   | Aiea CDP     | S        | I     | 9338   | 2876  | +21.3852618 | -157.9247497 | 57    |     |
| 3 | 5113853  | 0        | Ainaloa CDP  | S        | I     | 2965   | 1165  | +19.5214550 | -154.9943890 | 57    |     |
| 4 | 9400720  | 1001460  | Anahola CDP  | S        | I     | 2223   | 754   | +22.1457750 | -159.3138330 | 57    |     |

151 rows returned in 35ms from: SELECT \*  
FROM geo\_header\_sf1  
WHERE sumlev='160'

know that Table P3 is the primary table for Race Alone. We can go into the Table Matrix section in Chapter 6 and get a readout for Table P3 that tells us that it is located in file 03 and consists of eight variables: The first one P0030001 is for total population and P0030006 is for Hawaiian and Other Pacific Islander Alone (Figure 5.7). Knowing this, we can write the following query:

```
SELECT g.place, g.name, s.P0030001, s.P0030006
FROM geo_header_sf1 g
INNER JOIN sf1_00003 s ON (g.logrecno=s.logrecno)
WHERE g.sumlev='160'
ORDER BY g.place;
```

11. **Final tweaks.** To clearly identify what the output of our query represents, we can add aliases to replace the variable ID codes. We can also calculate some percent totals and add the proper FIPS code. The summary files do not provide full GEOIDs; if we needed them for some reason (maybe for joining this data to another dataset), we can construct them out of the identifiers. Recall from Chapter 3 that FIPS codes for places that nest within states consist of two parts: (1) the two-digit state code and (2) the five-digit place code. Revise your previous statement with this one (Figure 5.8):

```
SELECT (g.state || g.place) AS fips, g.name,
       s.p0030001 AS totpop, s.p0030006 AS islanderpop,
       ROUND((((CAST(p0030006 AS REAL) / CAST(p0030001 AS REAL))
               *100),1) AS pct
FROM geo_header_sf1 g
INNER JOIN sf1_00003 s ON (g.logrecno=s.logrecno)
WHERE g.sumlev='160'
ORDER BY g.place;
```



FIGURE 5.7 ■ TECHNICAL DOCUMENTATION SHOWING FILE CONTENTS

POPULATION SUBJECTS SUMMARIZED TO THE BLOCK LEVEL—Con.

File 03—File Linking Fields (comma delimited). These fields link File 03 with the geographic header.

| Field name                                    | Data dictionary reference name | Max size | Data type |
|-----------------------------------------------|--------------------------------|----------|-----------|
| File Identification                           | FILEID                         | 6        | A/N       |
| State/U.S. Abbreviation (USPS)                | STUSAB                         | 2        | A         |
| Characteristic Iteration                      | CHARITER                       | 3        | A/N       |
| Characteristic Iteration File Sequence Number | CIFSN                          | 2        | A/N       |
| Logical Record Number                         | LOGRECNO                       | 7        | N         |

P3.

RACE [8]

Universe: Total population

Total:

|                                                  |          |    |   |
|--------------------------------------------------|----------|----|---|
| White alone                                      | P0030001 | 03 | 9 |
| Black or African American alone                  | P0030002 | 03 | 9 |
| American Indian and Alaska Native alone          | P0030003 | 03 | 9 |
| Asian alone                                      | P0030004 | 03 | 9 |
| Native Hawaiian and Other Pacific Islander alone | P0030005 | 03 | 9 |
| Some Other Race alone                            | P0030006 | 03 | 9 |
| Two or More Races                                | P0030007 | 03 | 9 |

FIGURE 5.8 ■ QUERY RESULT WITH ALIASES AND CALCULATED FIELDS

|   | fips    | name         | totpop | islanderpop | pct  |
|---|---------|--------------|--------|-------------|------|
| 1 | 1500400 | Ahuimanu CDP | 8810   | 842         | 9.6  |
| 2 | 1500550 | Aiea CDP     | 9338   | 531         | 5.7  |
| 3 | 1501085 | Ainaloa CDP  | 2965   | 436         | 14.7 |
| 4 | 1502200 | Anahola CDP  | 2223   | 851         | 38.3 |

151 rows returned in 34ms from: SELECT (g.state || g.place) AS fips, g.name, s.p0030001 AS totpop, s.p0030006 AS islanderpop, round(((cast(p0030006 as real) / cast(p0030001 as real))\*100),1) AS pct FROM geo\_header\_sf1 g, sf1\_00003 s

To build the FIPS code, we use the double bars “||” to take text in one column and combine it with another (in a spreadsheet this is known as a CONCATENATE formula). We use AS to provide an alias for this calculated field, as well as to simply rename the variable ID columns. Why does the percent total calculation look so intense? In a database, when you divide one integer by another integer, the resulting value is an integer. When calculating a percent total, the value will always be rounded off to 0 or 1, which is not useful. To avoid this, we use the CAST function to convert the integer to a real (decimal) number. The result is going to be many decimal places long, so we use the round function to get one decimal place. The easiest way to read nested statements like this is from the inside out: Cast the first value as real, then the second value,

then divide them, then multiply by 100, then round off everything to one decimal place. The parentheses are key to ensuring that the order of operations is followed and that the functions are given the correct arguments. In this case, round takes two arguments: the result of all the math that happens and then one that rounds the result to one decimal place.

12. **Save as a view.** In the statement in the previous step, before the SELECT clause, type CREATE VIEW hiplacepop AS, and hit the execute button to save the statement as a view. This allows you to quickly pull the view up in the Browse tab.

This exercise has demonstrated the power of databases for storing and retrieving data and illustrated how the summary files on the FTP site are constructed so you can grab data in bulk. Unfortunately, it takes time to manually import all the SF1 tables one by one. You could save time by just importing files that you know you'll need rather than importing everything. Consult the technical documentation to identify the relevant files.

If you were working with the Demographic Profile or with PL 94-171, this process would be much simpler, as these are smaller datasets with one or two data files. In Chapter 5 Supplemental Exercise folder, there is an extra subfolder that contains the summary file for the 2010 census Demographic Profile for Hawaii, SQL scripts for creating the data table (there's only one table) and the geographic header file, and technical documentation. Based on what we did in this exercise, for additional practice, try creating a new SQLite database for the Demographic Profile. Once the data is loaded, write a SQL statement that ties a specific type of geography from the header file to some variables of your choosing in the data file, and save it as a view.

Like the decennial census, the ACS is packaged into summary files (one for each period estimate) that you can access via the FTP site. ACS variables are spread across many individual files sorted by their table numbers; rows are uniquely identified with a LOGRECNO number, and this number can be linked back to specific geography in a geographic header file. The ACS summary files are more numerous than the decennial census; the state-level extract for 2016 has 246 files. The Census Bureau provides templates (table shells) for each data table and the geographic header file in Excel format, and all the data files are in a CSV format *including* the geographic header file. The data is packaged in collections of files for each state and for the nation, and for the 5-year estimates, these collections are broken into two extracts: one that contains block groups and tracts and the other for all other geographies. Within each set, the data for the estimates and margins of error are packaged in separate files, identified with a prefix "e" or "m."

While the Census Bureau provides easy-to-follow instructions for importing an individual data file into one of the Excel templates, using a spreadsheet to work with this data is tough. For a particular ACS table, you would need to import at least three files—(1) the geographic header, (2) the estimate table, and (3) the margin of error table—and would use VLOOKUP formulas to tie them together. This is fine if you need a couple of tables for all geographies, but this is not a feasible approach for working with a lot of data, or even a few variables scattered across many files. It still would be better to import the files into a database or a statistical package. Besides Excel, the Census Bureau provides table structures in a CSV and SAS format (SAS programmers can use preassembled macros). As before, you could also search github for scripts for generating tables in SQL or another stat package. The best launching point for accessing the ACS summary files is from the ACS technical documentation page: <https://www.census.gov/programs-surveys/acs/technical-documentation/summary-file-documentation.html>.

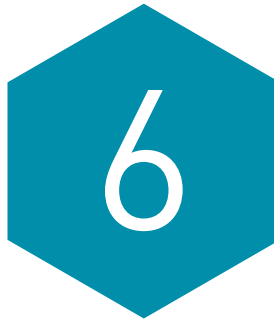

# THE AMERICAN COMMUNITY SURVEY

## 6.4 EXERCISES

---

### **Ranking ACS Data and Testing for Statistical Difference**

Census data is commonly used to categorize and rank places. As we have discussed, the census is used to distribute hundreds of billions of dollars in federal aid. In their case study of three federal programs, Nesse and Rahe (2015) found that none of the programs incorporated the margin of error (MOE) for American Community Survey (ACS) estimates into their calculations. In this exercise, we will explore the impact the MOE has on rankings and will get some more practice with aggregating values.

We will use one of the programs from this study in our example. The U.S. Department of Agriculture (USDA) runs the Supplemental Nutrition Assistance Program (SNAP), which provides food stamps to individuals in need. Funding is distributed to each of the states based on a variety of criteria and formulas. One aspect of the funding mechanism is the award of performance bonuses to states that do the best job at administering the program. Four different evaluation categories are used to administer bonuses, and one of them relies on census data. The Program Access Index (PAI) is used to award \$12 million to eight states: the four states that have the highest index value and the four states that showed the most improvement in their index compared with the previous year. Nine states receive awards in the event of a tie, and the money is divided in the same manner as it would be for eight states. If a state is among the top four in both the best category and best improved category,

that state receives only one award and the fifth best state is granted an award to bring the number up to eight.

The index is calculated for each state by dividing the average number of SNAP recipients in a month by the total population living below 125% of the poverty line in a calendar year. The data on poverty is from the 1-year ACS, while the data on SNAP recipients comes from the USDA's administrative records (the ACS includes data on SNAP recipients, but it's published at the household level, while the USDA's data is at the person level). The USDA makes a number of adjustments prior to calculating the index. The number of SNAP recipients is adjusted by deducting people who received benefits as part of disaster assistance and participants in the Food Distribution Program on Indian Reservations (FDPIR). The number of people in poverty is adjusted by deducting the number of average monthly participants in FDPIR and the total number of low-income Supplemental Security Income (SSI) recipients in California (U.S. Department of Agriculture, 2018).

In our example, we will account for the MOE in the calculations to create adjusted poverty estimates and the index. We will look at the rankings and identify the top four states in the best program category and will run the statistical difference test to see if the values between the fourth- and fifth-best state are truly different. The USDA publishes a thorough summary of the data used and statistics generated in an annual report USDA (2018). I created a spreadsheet that contains the necessary data for making the poverty adjustments and calculating the index by copying the relevant columns out of the report and pasting them into the workbook. We will import the poverty data from the ACS so that we get the MOEs (as they are not included in the report). The data is available in the Chapter 6 Supplementary Exercise folder, or you can obtain it from the following source:

**B17002 Ratio of Income to Poverty Level in the Past 12 Months:** 2016 ACS,  
All states in the United States (state)—<https://data.census.gov/>

**Calculating the SNAP Program Access Index: A Step-By-Step Guide:** USDA,  
2016 report—<https://www.fns.usda.gov/snap/calculating-supplemental-nutrition-assistance-program-snap-program-access-index-step-step-guide>

1. **Open the SNAP spreadsheet.** Go to Chapter 6 Supplementary Exercise folder and open the spreadsheet `snap_pai2016.xlsx` in Calc. You'll see four columns: (1) the name of the state, (2) the average adjusted monthly participants in SNAP, (3) the number of participants in California's SSI program, and (4) the average monthly participants in FDPIR (Figure 6.1). We will use these last two

**FIGURE 6.1** 2016 USDA SNAP PROGRAM ACCESS INDEX COMPONENTS

|   | A           | B                | C          | D              |
|---|-------------|------------------|------------|----------------|
| 1 | State       | Adj Monthly SNAP | CA SSI Adj | Monthly FDIPIR |
| 2 | Alabama     | 837112           |            |                |
| 3 | Alaska      | 83386            |            | 691            |
| 4 | Arizona     | 952900           |            | 11746          |
| 5 | Arkansas    | 412664           |            |                |
| 6 | California  | 4288126          | 416986     | 4706           |
| 7 | Colorado    | 472023           |            | 424            |
| 8 | Connecticut | 427447           |            |                |

**FIGURE 6.2** ACS TABLE B17002 RATIO OF INCOME TO POVERTY LEVEL

|    | A           | B                 | C                       | D                       | E                            |
|----|-------------|-------------------|-------------------------|-------------------------|------------------------------|
| 1  | GEO.id      | GEO.display-label | ESTIMATE#HD01_VDIM#VD01 | ESTIMATE#HD02_VDIM#VD01 | ESTIMATE#HD01_VDIM#VD01      |
| 2  | Id          | {dim.label}       | Estimate; Total:        | Margin of Error; Total: | Estimate; Total: - Under .50 |
| 3  | 0100000US   | United States     | 315165470               | 22993                   | 19636022                     |
| 4  | 0400000US01 | Alabama           | 4741329                 | 2442                    | 356387                       |
| 5  | 0400000US02 | Alaska            | 723968                  | 1193                    | 33035                        |
| 6  | 0400000US04 | Arizona           | 6771098                 | 3965                    | 525626                       |
| 7  | 0400000US05 | Arkansas          | 2898630                 | 2550                    | 213946                       |
| 8  | 0400000US06 | California        | 38513258                | 8112                    | 2389302                      |
| 9  | 0400000US08 | Colorado          | 5420327                 | 2295                    | 258193                       |
| 10 | 0400000US09 | Connecticut       | 3469514                 | 1932                    | 157228                       |

columns to adjust our poverty numbers. Note that the USDA excluded New Mexico from the rankings in 2016 due to some data quality issue.

2. **Import the poverty data.** Import the ACSDT1Y2016\_B17002\_with\_ann.csv file from Chapter 6 Supplementary Exercise folder. Click OK to get through the import screens. This is state-level data from Table B17002, Ratio of Income to Poverty Level in the Past 12 Months from the 2016 1-year ACS (Figure 6.2). The total estimate is for all persons for whom poverty status could be determined. The individual estimates tell us the number of people who fall in a certain range above or below the official poverty line. For example, in column E, the estimate is for the total people who live below 50% of the poverty line, while column K is the number of people who live at the poverty line (100%) to 125% above the poverty line. These ratios are used to capture a broader range of people who are living with limited means but who are above the official poverty level and to identify the absolute poorest Americans who are living below poverty line. The SNAP PAI incorporates everyone who is below 125% of poverty line, so we will need to aggregate several columns and exclude others.

3. **Remove unnecessary columns and rows.** Delete columns M through AB, as these fall outside the range we need. Then delete columns C and D as we don't need the totals. Delete the first row that contains the IDs, then delete the summary row for the United States. Scroll down to the bottom of the sheet and delete the row for Puerto Rico (since it's not a state, it doesn't participate in SNAP). Save your work by doing Save As, and save the file in a new spreadsheet called exercise2.
4. **Calculate total for 125% poverty and MOE.** Select column B, right-click, and Insert column to the right. Then do this a second time, so we have two blank columns in C and D. In cell C1, type the label poverty125, and in cell D1, type the label povertyMOE. In cell C2, type the formula =SUM(E2,G2,I2,K2). Copy and paste this formula down column C. In cell D2, type the formula =ROUND(SQRT(SUMSQ(F2,H2,J2,L2))). Copy and paste this formula down column D (Figure 6.3). This is the same formula we used in the last exercise for calculating aggregates, but in this case, we have to provide individual values instead of a range because the columns alternate between the estimates and the MOEs. Save your work.
5. **Copy the poverty columns into the SNAP worksheet.** We don't have matching ID codes in both our worksheets; we could do VLOOKUP on the names of the states, but since there are only 51 and both sheets are in alphabetical order, we'll do a simple copy and paste. Select columns B, C, and D in the poverty worksheet, and copy them. Flip over to the PAI2016 worksheet, click in cell E1, and do Paste Special—Values (do *not* transpose), so that we're pasting the values and not the formulas. To do a quick check that everything matches, in cell H2 type this formula: =IF(A2=E2,"ok","PROBLEM!"). Copy and paste the result down column H (Figure 6.4). The formula checks the state name in column A from our SNAP data against the one in column E from our poverty data. If they match, we know that our data lines up correctly and “ok”

FIGURE 6.3 ■ CALCULATE MARGIN OF ERROR FOR 125% POVERTY

| D2 |             | fx Σ =        |            |            |                              | =ROUND(SQRT(SUMSQ(F2,H2,J2,L2))) |  |
|----|-------------|---------------|------------|------------|------------------------------|----------------------------------|--|
|    | A           | B             | C          | D          | E                            |                                  |  |
| 1  | Id          | \$(dim.label) | poverty125 | povertyMOE | Estimate; Total: - Under .50 |                                  |  |
| 2  | 0400000US01 | Alabama       | 1058934    | 27389      | 356387                       |                                  |  |
| 3  | 0400000US02 | Alaska        | 96434      | 7730       | 33035                        |                                  |  |
| 4  | 0400000US04 | Arizona       | 1457773    | 34828      | 525626                       |                                  |  |
| 5  | 0400000US05 | Arkansas      | 674036     | 23015      | 213946                       |                                  |  |
| 6  | 0400000US06 | California    | 7372644    | 84186      | 2389302                      |                                  |  |
| 7  | 0400000US08 | Colorado      | 811601     | 24699      | 258193                       |                                  |  |
| 8  | 0400000US09 | Connecticut   | 447210     | 18628      | 157228                       |                                  |  |







**FIGURE 6.6** ■ TESTING SIGNIFICANT DIFFERENCE BETWEEN FOURTH- AND FIFTH-RANKED PAI

| K6                                                   |            |             |             |       |         |             |
|------------------------------------------------------|------------|-------------|-------------|-------|---------|-------------|
| fx Σ = =ABS((I5-I6)/SQRT((J5/1.645)^2+(J6/1.645)^2)) |            |             |             |       |         |             |
|                                                      | F          | G           | H           | I     | J       | K           |
| 1                                                    | povertyMOE | Adj Poverty | Adj Poverty | PAI   | PAI MOE |             |
| 2                                                    | 10073      | 138825      | 10073       | 1.066 | 0.077   |             |
| 3                                                    | 11705      | 171872      | 11705       | 1.016 | 0.069   |             |
| 4                                                    | 25972      | 721076      | 25972       | 1     | 0.036   |             |
| 5                                                    | 11590      | 170528      | 11590       | 0.999 | 0.068   |             |
| 6                                                    | 23095      | 732794      | 23095       | 0.994 | 0.031   | 0.110058685 |
| 7                                                    | 18628      | 447210      | 18628       | 0.956 | 0.04    |             |

the values are significant. Based on the result of our formula, the test value is only 0.110, which is less than the Z value (Figure 6.6). This means the PAI for the two states is not statistically different from each other. Based on this outcome, you could argue that Maryland is as equally deserving as Rhode Island to receive a bonus.

- Calculate statistical difference for other values.** Let's see if any of the other PAIs are not statistically different. Since the fourth-place cutoff is what matters and the order of ranks below this doesn't, we need to test each state against fourth-place Rhode Island. Modify the formula in cell K6 to lock the values for Rhode Island:  $=ABS((\$I\$5-I6)/SQRT((\$J\$5/1.645)^2+(J6/1.645)^2))$ . Copy and paste the formula down the column. It turns out that there are actually four states whose PAI values are not significantly different from Rhode Island's, as their test value falls below 1.645: Maryland, Connecticut, Washington, and the District of Columbia (Figure 6.7). Ninth-ranked Pennsylvania is the cutoff: Since its test value is higher than the Z value, its PAI is significantly different from Rhode Island's. To make sure your formulas are correct, check a few of the values against Cornell's calculator. The calculator won't return the test score but simply indicates whether the difference is significant or not. Save your work.

This exercise reveals the challenge of working with sample-based estimates, which have a degree of ambiguity that doesn't exist for counts derived from total enumerations or administrative records. Statistically, the PAI for the states ranked fifth through eighth is not different from the PAI for the fourth-ranked state, but the real outcome between being ranked fourth and fifth is sharing in a \$12 million bonus versus receiving nothing. You could argue that these states are in fact tied, and the money should be split among all of them (bearing in mind that this example only considers the first aspect of the award mechanism).

**FIGURE 6.7** ■ PAI VALUES THAT ARE NOT SIGNIFICANTLY DIFFERENT FROM THE FOURTH-RANKED VALUE

|    | A                    | B                | C          | D              | E          | F          | G           | H           | I     | J       | K           |
|----|----------------------|------------------|------------|----------------|------------|------------|-------------|-------------|-------|---------|-------------|
| 1  | State                | Adj Monthly SNAP | CA SSI Adj | Monthly FDIPIR | poverty125 | povertyMOE | Adj Poverty | Adj Poverty | *PAI  | PAI MOE |             |
| 2  | Delaware             | 148029           |            |                | 138825     | 10073      | 138825      | 10073       | 1.066 | 0.077   |             |
| 3  | Hawaii               | 174558           |            |                | 171872     | 11705      | 171872      | 11705       | 1.016 | 0.069   |             |
| 4  | Oregon               | 721309           |            | 765            | 721841     | 25972      | 721076      | 25972       | 1     | 0.036   |             |
| 5  | Rhode Island         | 170430           |            |                | 170528     | 11590      | 170528      | 11590       | 0.999 | 0.068   |             |
| 6  | Maryland             | 728046           |            |                | 732794     | 23095      | 732794      | 23095       | 0.994 | 0.031   | 0.110058685 |
| 7  | Connecticut          | 427447           |            |                | 447210     | 18628      | 447210      | 18628       | 0.956 | 0.04    | 0.896601716 |
| 8  | Washington           | 988779           |            | 3370           | 1069229    | 29429      | 1065859     | 29429       | 0.928 | 0.026   | 1.604302707 |
| 9  | District of Columbia | 131341           |            |                | 143434     | 10533      | 143434      | 10533       | 0.916 | 0.067   | 1.430254456 |
| 10 | Pennsylvania         | 1858849          |            |                | 2079210    | 39893      | 2079210     | 39893       | 0.894 | 0.017   | 2.464233284 |

Under federal regulations, the USDA has flexibility in deciding what criteria to use, how to generate the index, and how to award the bonuses based on the outcome. We are not saying that they are violating the regulations. For example, the regulations specify that they should use 130% of poverty as a ratio, but they use 125% as the former value is not published by the Census Bureau. The USDA previously used poverty estimates from the Current Population Survey but switched to the ACS as the estimates were more precise. One could argue that the rank and thus the award is based on the median value of the interval, regardless of what the MOE is. In public policy, there is always a trade-off between being statistically precise and using a simpler method that more people can grasp and thus agree with.

One final note: You should only create derived values for geographies (like the neighborhood in our first exercise in Chapter 6) or categories (like the PAI in this exercise) that do not already exist. There's no need to aggregate values for census tracts to counties because the Census Bureau has already created these estimates. In this exercise, the value that we calculated for the number of people below 125% poverty was actually already published in another table—summary table S1701 Poverty Status in the last 12 months (this table has a lot more variables in it relative to the table we used). The MOEs for published census estimates are often more precise than the ones we calculate ourselves. That's because the Census Bureau generates its estimates directly from the individual sample records, while our estimates are derived from total estimates. For example, the number of people below 125% poverty in Alabama was 1,058,934 in the 1-year 2016 ACS. Our derived MOE for this estimate was 27,389, but in the Census Bureau's published table, it was 26,546. In circumstances like this exercise, where a small difference could translate to getting millions of dollars or not, we'd want to use the most accurate estimates possible (but in this case, it was better that you got additional practice aggregating the data yourself!).

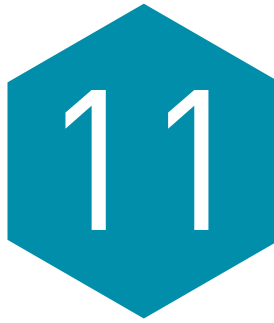

# CENSUS DATA DERIVATIVES

## 11.4 MEANS AND MEDIANS FOR AGGREGATES

---

Calculating a new median for aggregates is more complex than calculating a new mean, but we will walk through each step since the process is not widely documented. Remember that the median value represents the case that falls in the center of a distribution. To calculate a new median, we would need to combine the records of individual respondents from these two census tracts, sort them, and select the middle value. This isn't possible as we only have access to summarized data. The solution is to use a method called statistical interpolation, where we can derive the median based on ranges of data. The Census Bureau publishes interval data for a number of variables, such as Table B19001 Household Income, where the number of households are counted by income brackets.

The California State Data Center (2016) published a brief tutorial demonstrating how to calculate a derived median and its associated margin of error (MOE). The following steps are based on their example, using our two New Orleans census tracts. The published 2012–2016 medians for the tracts are \$68,780 ( $\pm 5,160$ ) and \$64,333 ( $\pm 12,774$ ), respectively. Table 11.1 is the original household income table for these two tracts. We would aggregate this data for the two tracts using the techniques learned in Chapter 6. Figure 11.1 displays what the final layout of the spreadsheet should look like, and we will refer to it throughout the example. The top of the sheet in this figure displays how the aggregated household data should be reformatted (in the first step), while the bottom of the sheet shows the results of the formulas for each of the steps that we'll take below. The cells that are highlighted in the figure represent values that are used in the calculations. A copy of this spreadsheet as well as the

**TABLE 11.1** HOUSEHOLD INCOME FOR TWO CENSUS TRACTS IN ORLEANS PARISH, LOUISIANA

| Income                 | Tract 38   |     | Tract 135  |     |
|------------------------|------------|-----|------------|-----|
|                        | Households | MOE | Households | MOE |
| Less than \$10,000     | 66         | 48  | 53         | 34  |
| \$10,000 to \$14,999   | 16         | 17  | 29         | 26  |
| \$15,000 to \$19,999   | 28         | 27  | 53         | 60  |
| \$20,000 to \$24,999   | 70         | 37  | 113        | 92  |
| \$25,000 to \$29,999   | 18         | 21  | 84         | 49  |
| \$30,000 to \$34,999   | 22         | 23  | 43         | 37  |
| \$35,000 to \$39,999   | 25         | 23  | 20         | 21  |
| \$40,000 to \$44,999   | 35         | 28  | 86         | 67  |
| \$45,000 to \$49,999   | 23         | 37  | 16         | 23  |
| \$50,000 to \$59,999   | 27         | 25  | 99         | 49  |
| \$60,000 to \$74,999   | 145        | 64  | 160        | 73  |
| \$75,000 to \$99,999   | 101        | 56  | 193        | 90  |
| \$100,000 to \$124,999 | 91         | 51  | 88         | 54  |
| \$125,000 to \$149,999 | 45         | 35  | 49         | 38  |
| \$150,000 to \$199,999 | 27         | 24  | 88         | 48  |
| \$200,000 or more      | 96         | 53  | 150        | 77  |
| Total                  | 835        | 126 | 1,324      | 157 |

Source: 2012–2016 ACS Table B19001.

original data for these two tracts are stored in Chapter 11 Supplementary Example folder.

To calculate the new median, you need to do the following:

1. **Reformat the data.** Create a table that resembles the top of the sheet depicted in Figure 11.1. We take the labels from the ranges and split them into separate columns that contain just the values, so we can incorporate them into our calculations. We replace the bottom and top ends of the ranges with values suggested by the Census Bureau:  $-2,500$  for the start and  $250,001$  for the end. Using spreadsheet formulas, we calculate running totals for both the number

**FIGURE 11.1**  CALCULATING A NEW MEDIAN FOR AGGREGATED ACS DATA IN A SPREADSHEET

|    | A                           | B         | C             | D                | E                 | F            |
|----|-----------------------------|-----------|---------------|------------------|-------------------|--------------|
| 2  | Range start                 | Range end | Households    | Cumulative Total | Cumulative PCT    |              |
| 3  | TOTAL                       |           | 2159          |                  |                   |              |
| 4  | -2,500                      | 9,999     | 119           | 119              | 5.5               | Bottom Range |
| 5  | 10,000                      | 14,999    | 45            | 164              | 7.6               |              |
| 6  | 15,000                      | 19,999    | 81            | 245              | 11.3              |              |
| 7  | 20,000                      | 24,999    | 183           | 428              | 19.8              |              |
| 8  | 25,000                      | 29,999    | 102           | 530              | 24.5              |              |
| 9  | 30,000                      | 34,999    | 65            | 595              | 27.6              |              |
| 10 | 35,000                      | 39,999    | 45            | 640              | 29.6              |              |
| 11 | 40,000                      | 44,999    | 121           | 761              | 35.2              | p lower      |
| 12 | 45,000                      | 49,999    | 39            | 800              | 37.1              |              |
| 13 | 50,000                      | 59,999    | 126           | 926              | 42.9              |              |
| 14 | 60,000                      | 74,999    | 305           | 1231             | 57                | Mid-Range    |
| 15 | 75,000                      | 99,999    | 294           | 1525             | 70.6              | p upper      |
| 16 | 100,000                     | 124,999   | 179           | 1704             | 78.9              |              |
| 17 | 125,000                     | 149,999   | 94            | 1798             | 83.3              |              |
| 18 | 150,000                     | 199,999   | 115           | 1913             | 88.6              |              |
| 19 | 200,000                     | 250,001   | 246           | 2159             | 100               | Top Range    |
| 20 |                             |           |               |                  |                   |              |
| 21 | Derived Median Calculations |           |               |                  |                   |              |
| 22 | Step 2                      | 1080      |               | Step 1           | 16.1              |              |
| 23 | Step 3                      | In row 13 |               | Step 2a          | 33.9              |              |
| 24 | Step 4                      | 154       |               | Step 2b          | 66.1              |              |
| 25 | Step 5                      | 0.505     |               | Step 3           | In rows 10 and 14 |              |
| 26 | Step 6                      | 7573      |               | Step 4a          | 43,875            |              |
| 27 | Step 7                      | 67,573    | Median HH Inc | Step 4b          | 91,655            |              |
| 28 |                             |           |               | Step 5           | 23,890            |              |
| 29 |                             |           |               | Step 6           | 39,299            | MOE          |
| 30 |                             |           |               |                  |                   |              |
| 31 |                             | p lower   | p upper       |                  |                   |              |
| 32 | A1                          | 40,000    | 75,000        |                  |                   |              |
| 33 | A2                          | 45,000    | 100,000       |                  |                   |              |
| 34 | C1                          | 29.6      | 57            |                  |                   |              |
| 35 | C2                          | 35.2      | 70.6          |                  |                   |              |

of households and the percentage of the total. We don't need to use the MOEs for the households, so it's best to hide or remove this information from the spreadsheet to avoid confusion.

2. **Determine which range holds the midpoint.** Divide the number of households by 2, and if the result is a fraction, round up.

$$2,159 \div 2 = 1,080$$

3. **Identify the range that contains this midpoint.** Using the cumulative total, the 1,080th household falls within the \$60,000 to \$74,999 income bracket. The previous bracket ends at the 926th household and this bracket ends at the 1,231st, so 1,080 falls within this range.

4. **Calculate how many households in the midrange are needed to reach the midpoint.** We subtract the number of households from the previous range from the midpoint.

$$1,080 - 926 = 154$$

5. **Calculate the proportion of the number of households in the midrange (60,000–74,999) that are needed to get to the midpoint.** Using the result from the previous step and the number of households in the midrange,

$$154 \div 305 = 0.505$$

6. **Apply this proportion to the width of the midrange dollar values.** First, we calculate the width, then we apply the proportion:

$$(74,999 - 60,000) * 0.505 = 7,573$$

7. **Calculate the new median.** Using the beginning of the midrange and the result from the last step:

$$60,000 + 7,573 = \$67,573$$

This result is close to the medians of the individual tracts, so this outcome seems reasonable. Calculating the MOE is more involved and uses formulas that are typically employed when creating derivatives of public use microdata.

1. **Approximate the standard error of a 50% proportion.** The formula for this is printed below, where B represents the total number of households (the base) and DF is the design factor from the Public Use Microdate Samples (PUMS) files. The DF is a table of constants published for different variables at the national level and for individual states. We'll discuss the source for these variables at the end; the DF for income variables for the State of Louisiana in 2012–2016 is 1.5:

$$SE(50\%) = DF * \sqrt{\frac{99}{B} * 50^2}$$

$$1.5 * \sqrt{\frac{99}{2,159} * 50^2} = 16.1$$

2. **Subtract and add the standard error from the last step to 50%.** This will give us the lower and upper bounds.

$$p\_lower = 50 - 16.1 = 33.9$$

$$p\_upper = 50 + 16.1 = 66.1$$

3. **Identify the ranges in the distribution that contain the lower and upper bounds.** Using the cumulative percentages, 33.9 (p\_lower) falls within the 40,000 to 44,999 range; the previous range stops at 29.6, and this range stops at 35.2, so 33.9 falls within it. The 75,000 to 99,999 range contains 66.1 (p\_upper). Note that it is possible that your lower and upper bounds could fall within the same range; we'll discuss this variation at the end.
4. **Approximate the lower and upper bounds for a confidence interval about the median.** To do this, we need to identify these four variables for each of the bounds:
- A1: the smallest value in the range (40,000 for p\_lower and 75,000 for p\_upper)
  - A2: the smallest value in the next higher range (45,000 for p\_lower and 100,000 for p\_upper)
  - C1: the cumulative percentage of households less than the A1 range (29.6 for p\_lower and 57.0 for p\_upper)
  - C2: the cumulative percentage of households less than the A2 range (35.2 for p\_lower and 70.6 for p\_upper)

In your spreadsheet, it's helpful to explicitly label these values as depicted in the bottom of Figure 11.1, as this can help you avoid mistakes. Instead of hard coding the value beside the label, you can provide a reference to the cell that contains it, that is, "cell value." Once you've identified the values, you can insert them into this formula and calculate the lower and upper values:

$$\text{Bound} = \left( \frac{p - C1}{C2 - C1} \right) * (A2 - A1) + A1$$

$$\left( \frac{33.9 - 29.6}{35.2 - 29.6} \right) * (45,000 - 40,000) + 40,000 = 43,875$$

$$\left( \frac{66.1 - 57}{70.6 - 35.2} \right) * (100,000 - 75,000) + 75,000 = 91,655$$



5. **Approximate the standard error of the median.** Using the upper and lower bounds from the last step:

$$0.5 * (91,655 - 43,875) = 23,890$$

6. **Calculate the MOE.** Remember from Chapter 6 that 1.645 is the constant that applies to all ACS estimates, which are published at a 90% confidence interval:

$$1.645 * 23,890 = 39,299$$

The median household income for these two census tracts combined is \$67,573 ( $\pm 39,299$ ). The MOE is quite high, but this isn't unusual for this procedure. These interpolation methods produce more conservative or higher MOEs than you would get if you were creating a median using the original, individual data values. If we used this procedure to calculate the median and MOE for a known published value, such as income for one of the census tracts, the calculated estimate would differ and its MOE would be higher.

One variation that you may encounter is that your bounds for `p_lower` and `p_upper` could fall within the same value range. If this occurs, you would only need to create one set of `A` and `C` values in Step 4 and apply them to both the lower and upper bounds formula (so the only variable that would differ between the two formulas would be the `p_bound` variable).

The Census Bureau publishes and annually updates the `DF` variables used in Step 1 in technical documentation titled “Public Use Microdata Sample (PUMS) Accuracy of the Data” (U.S. Census Bureau, 2017). This documentation is published in PDF format and is stored under the PUMS documentation section of the ACS website. Factors for each variable are published for the nation as a whole and each individual state (including the District of Columbia and Puerto Rico) in the appendix of this document. You will need to look up the appropriate factor for the specific year, state, and variables you're working with. In this example, the `DF` for household or family income variables for Louisiana for 2012–2016 was 1.5; for the entire nation, the variable is 1.6.

# REFERENCES

---

California State Data Center. (2016, April). *Re-calculating medians and their margin of errors for aggregated ACS data* (January 2011 Network News, revised 2016). Sacramento: California State Data Center, Demographic Research Unit. Retrieved from [http://www.dof.ca.gov/Forecasting/Demographics/Census\\_Data\\_Center\\_Network/](http://www.dof.ca.gov/Forecasting/Demographics/Census_Data_Center_Network/).

Nesse, K., & Rahe, M. L. (2015). Conflicts in the use of the ACS by federal agencies between statutory requirements and survey methodology. *Population Research and Policy Review*, 34, 461–480.

U.S. Census Bureau. (2017). *Public Use Microdata Sample PUMS accuracy of the data (2012–2016)* (Tech. Rep.). Washington, DC: Author. Retrieved from <https://www.census.gov/programs-surveys/acs/technical-documentation/pums/documentation.html>.

U.S. Department of Agriculture. (2018, February). *Calculating the Supplemental Nutrition Assistance Program (SNAP) Program Access Index: A step-by-step guide for 2016* (Tech. Rep.). Washington, DC: Food and Nutrition Service. Retrieved from <https://www.fns.usda.gov/snap/calculating-supplemental-nutrition-assistance-program-snap-program-access-index-step-step-guide>.
